# Supplementary material for: Hierarchical hyper-branched titania nanorods with tuneable selectivity for CO2 photoreduction
Source: Royal Society of Chemistry journal article supplement (doi:10.1039/d1ra05414g), 2021-01-01
Supplement: d1ra05414g1.pdf [file d1ra05414g1.pdf]

## Supplementary information

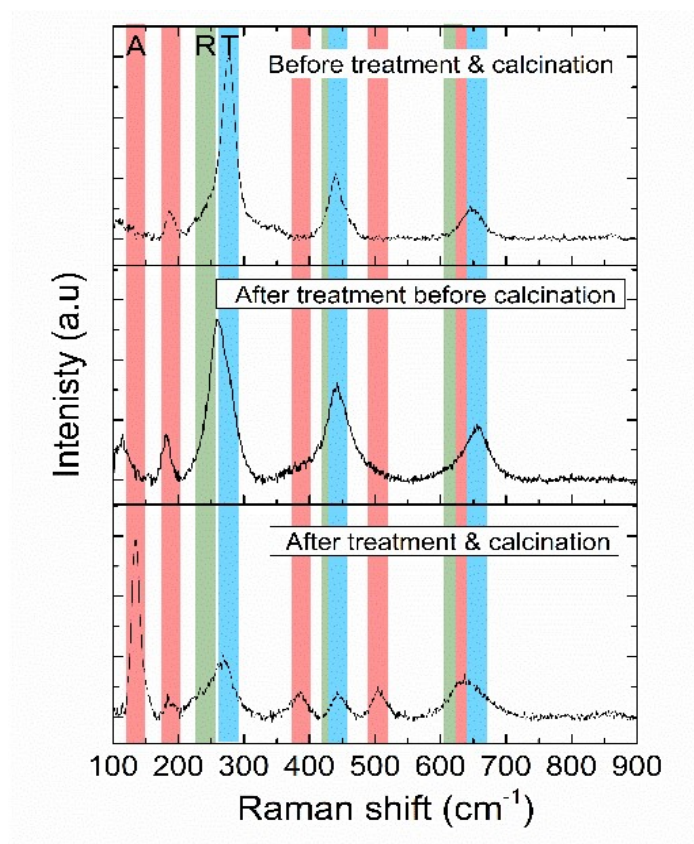

Figure S1 - Raman spectra investigation of the phase altering step from potassium titanates to anatase phase.

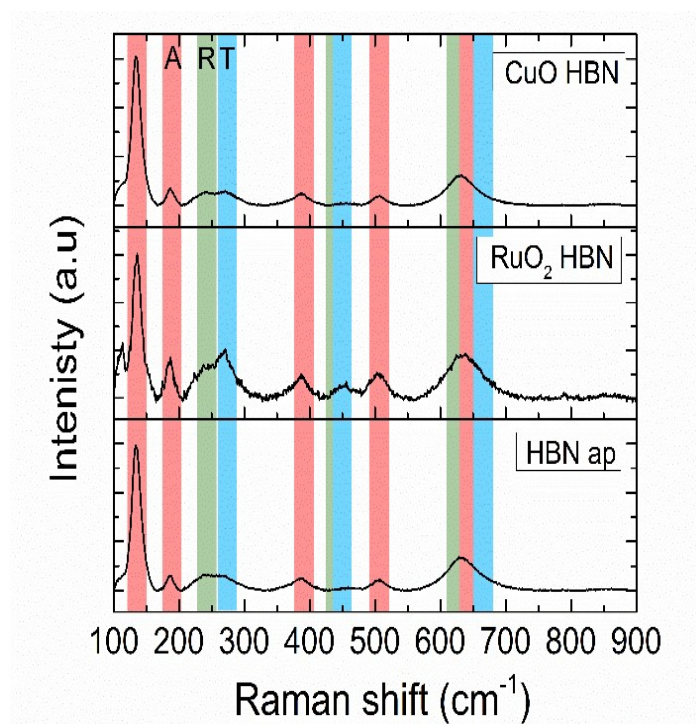

**Figure S2** - Raman spectra of the RuO<sub>2</sub> HBN and CuO HBN samples with as-prepared HBN ap. The figure shows very similar spectra with no Ru or Cu related peaks.

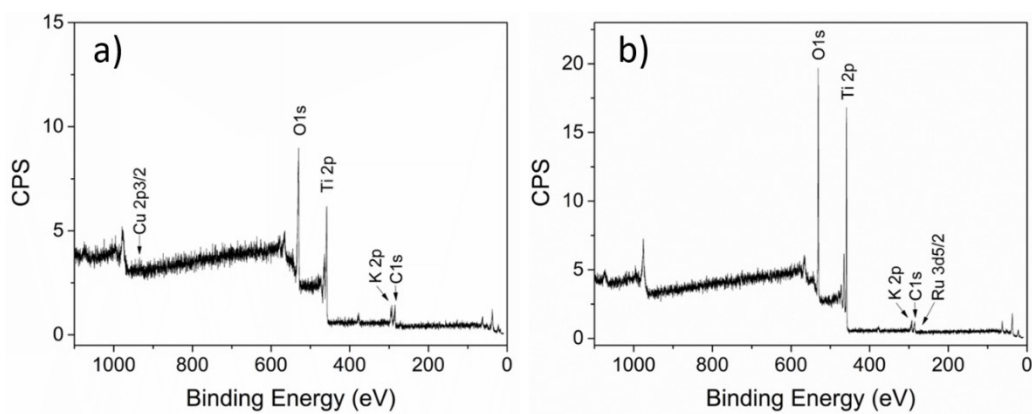

**Figure S3** - XPS survey spectra for a) CuO HBN and b) RuO<sub>2</sub> HBN samples with annotated peaks.

CH4 HBNs BP

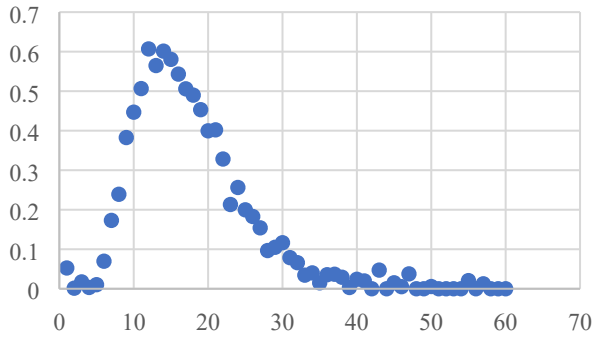

CO HBNs BP

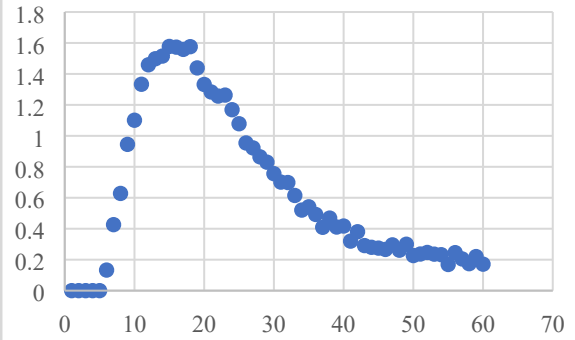

CH4 HBNs AP

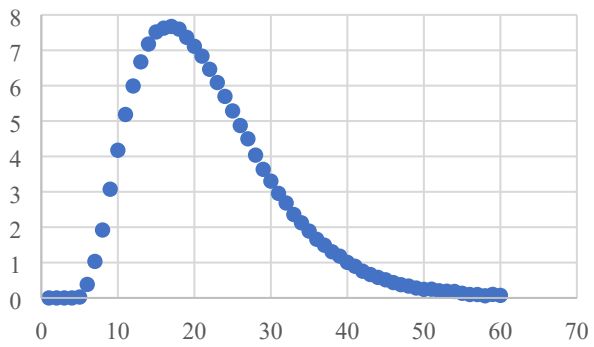

CO HBNs AP

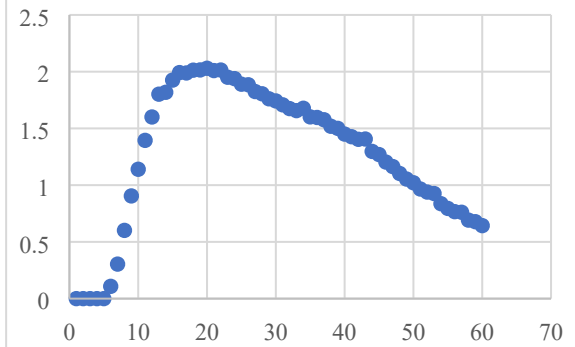

CH4 RuO2-HBNs

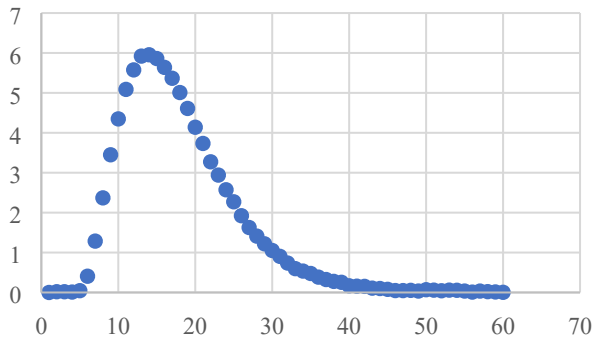

CO RuO2-HBNs

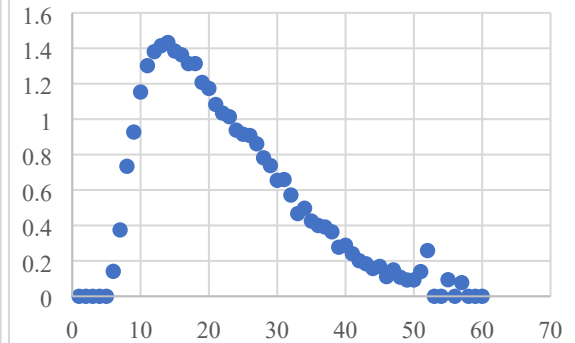

CH4 CuO-HBNs

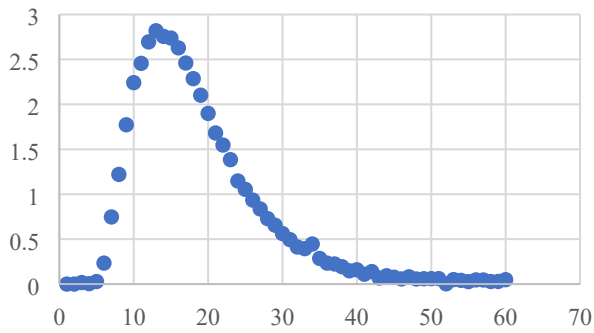

CO - CuO-HBNs

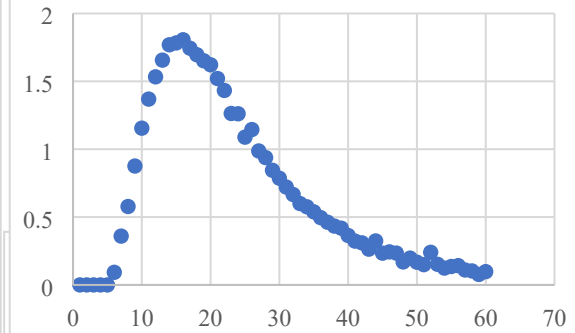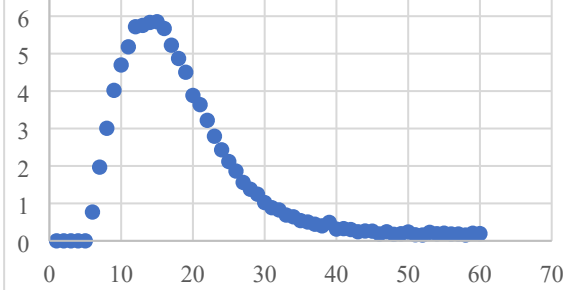

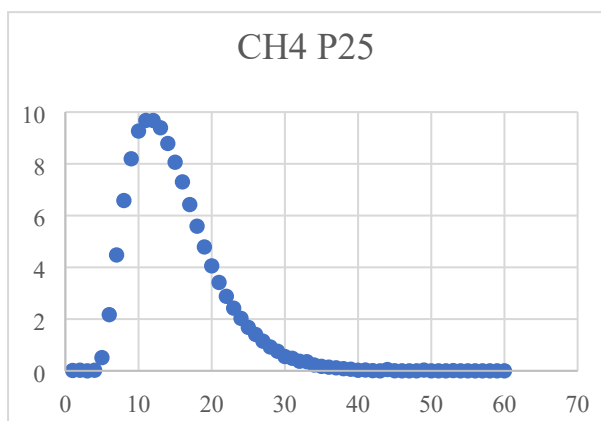

**Figure S4** – Gaseous products production ( $\mu\text{mols/g}_{\text{cat}}$ ) plotted against GC cycles for all the examined samples. Each cycle takes 4 minutes to complete, the data above represent 4 hours of reaction.
